# Supplementary material for: Double-Edged Lipid Nanoparticles Combining Liposome-Bound TRAIL and Encapsulated Doxorubicin Showing an Extraordinary Synergistic Pro-Apoptotic Potential
Source: PubMed Central journal article supplement (PMC6966652; doi:10.3390/cancers11121948), 2019-12-05
Supplement: cancers-11-01948-s001.pdf [file cancers-11-01948-s001.pdf]

Supplemental figure 1.

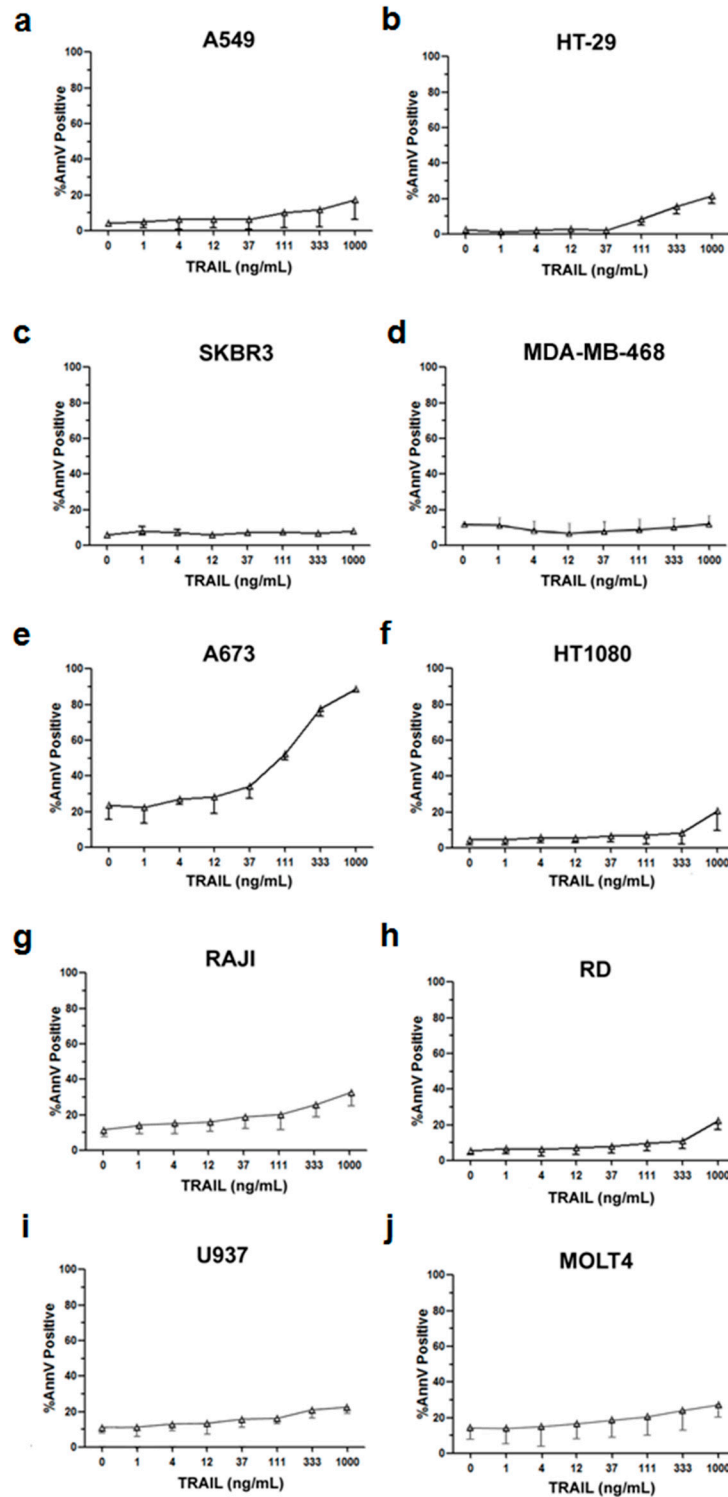

Cytotoxicity of soluble TRAIL on a panel of tumor cell lines from distinct origin. A panel of tumor cell lines were treated with increasing concentrations of LUV-TRAIL, LUVDOX, or LUVDOX-TRAIL for 24 h. The following day, cell death was measured by annexin-V staining. (a) A549 cells, (b) HT-29 cells, (c) SKBR3 cells, (d) MDA-MB-468, (e) A673 cells, (f) HT1080 cells, (g) Raji cells, (h) RD cells, (i) U937 cells, and (j) MOLT4 cells. Results are the mean  $\pm$  SD of three independent experiments.

Supplementary Figure 2.

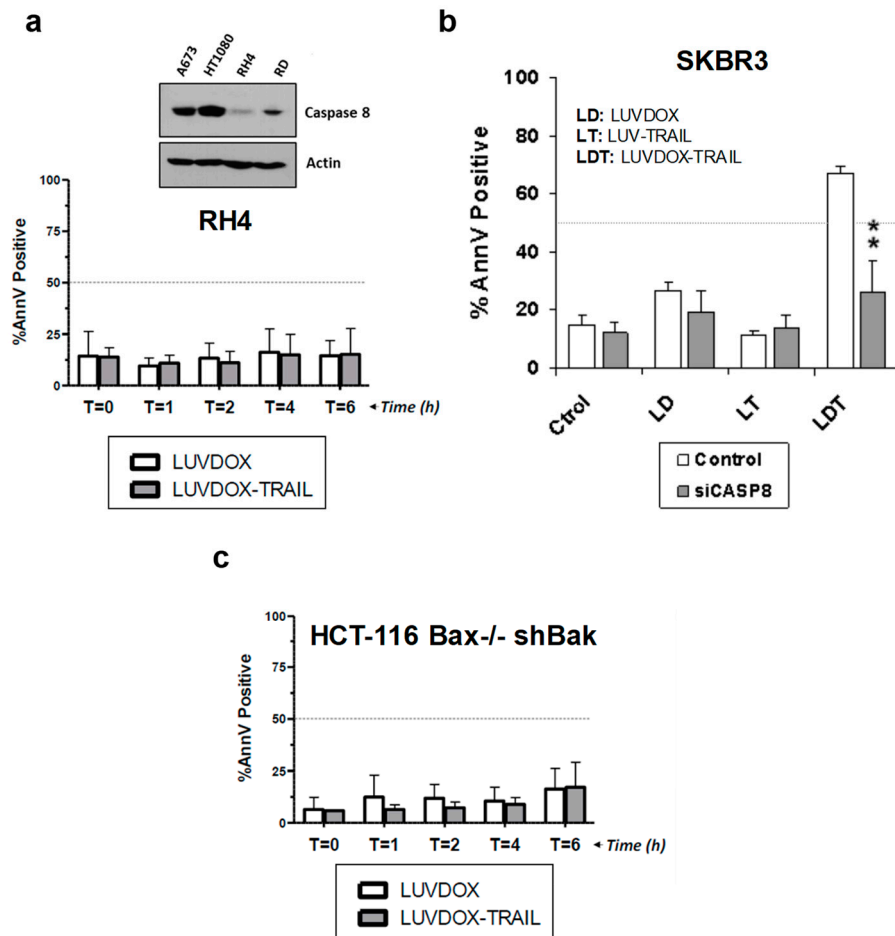

Cytotoxicity of LUV-DOXTRAIL on HCT-116 Bax<sup>-/-</sup>shBak, RH4 cells. **(A)** HCT-116 Bax<sup>-/-</sup>shBak cells and, **(B)** RH4 cells (deficient in caspase-8, see Western blot) were treated with LUVDOX or LUVDOX-TRAIL at their maximum working concentrations (1000  $\mu\text{g}/\text{mL}$  TRAIL; 64.56  $\mu\text{M}$  DOX) for the indicated times. When the time course was finished, apoptotic cells were measured by annexin-V staining. **(C)** Cytotoxicity of LUV-DOXTRAIL on SKBR3 siCASP8 cells. SKBR3 wild-type and SKBR3 cells with caspase-8 silenced (siCASP8) were treated with LUVDOX (LD), LUV-TRAIL (LT), and LUVDOX-TRAIL (LDT) at their maximum working concentrations (1000  $\mu\text{g}/\text{mL}$  TRAIL; 64.56  $\mu\text{M}$  DOX) for 24 h. Then, apoptosis was quantified by annexin-V staining. Results are the mean  $\pm$  SD of at least four independent experiments. \*\*  $p < 0.01$ .

Supplemental Figure 3.

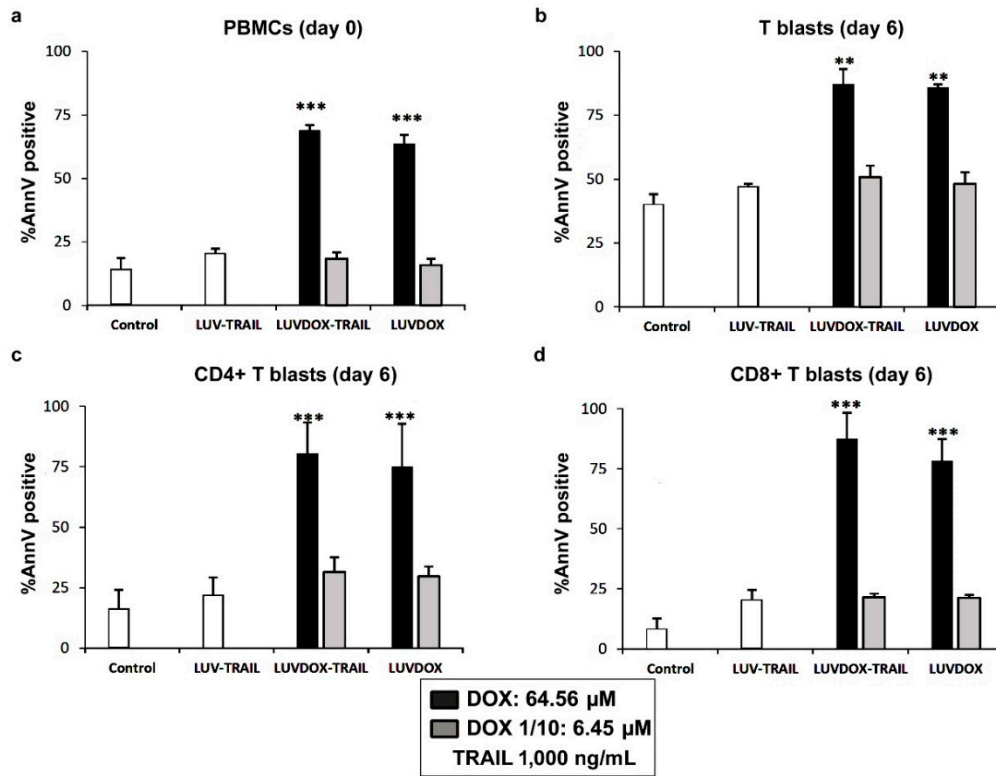

Cytotoxicity of LUVDOX-TRAIL 1/10 on peripheral blood mononuclear cells and T-cell blasts. Peripheral blood mononuclear cells (PBMC) and 6-day T-cell blasts generated from PBMC were treated with LUVDOX-TRAIL (final concentration of TRAIL, 1000 ng/ml) or with LUVDOX with different entrapped DOX concentrations (DOX: 64.56 μM or DOX 1/10: 6.45 μM). After 24 h, cell death was quantified by annexin-V staining. (a) PBMC, (b) Total 6-day T-cell blasts, (c) CD4<sup>+</sup> 6-day T-cell blasts, and (d) CD8<sup>+</sup> 6-day T-cell blasts. Graphs show the mean ± SD of at least three independent experiments. \*\*  $p < 0.005$ , \*\*\*  $p < 0.001$ .
